# Supplementary material for: Biodegradable Chitosan Nanoparticle Coatings on Titanium for the Delivery of BMP-2
Source: MDPI journal article supplement (doi:10.3390/biom5010003), 2015-01-08
Supplement: s1 [file s1]

## Supplementary Files

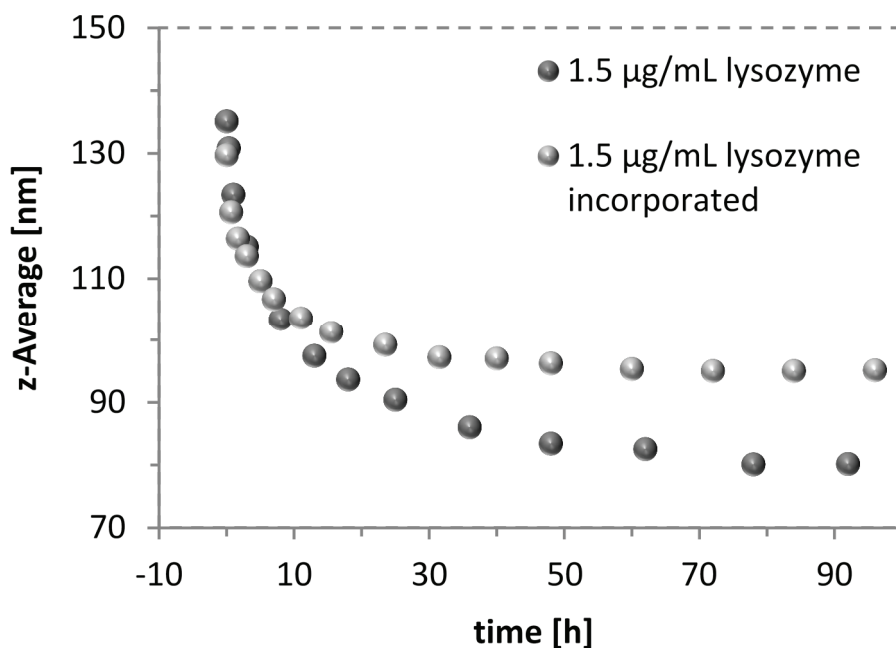

**Figure S1.** Plot of the particle size over the time during the degradation with 1.5 µg/mL lysozyme (“incorporated” and “free”) at 37 °C for chitosan-tripolyphosphate (3:1, 1 mg/mL, 0.075% AcOH, DA 42%) nanoparticle solutions.

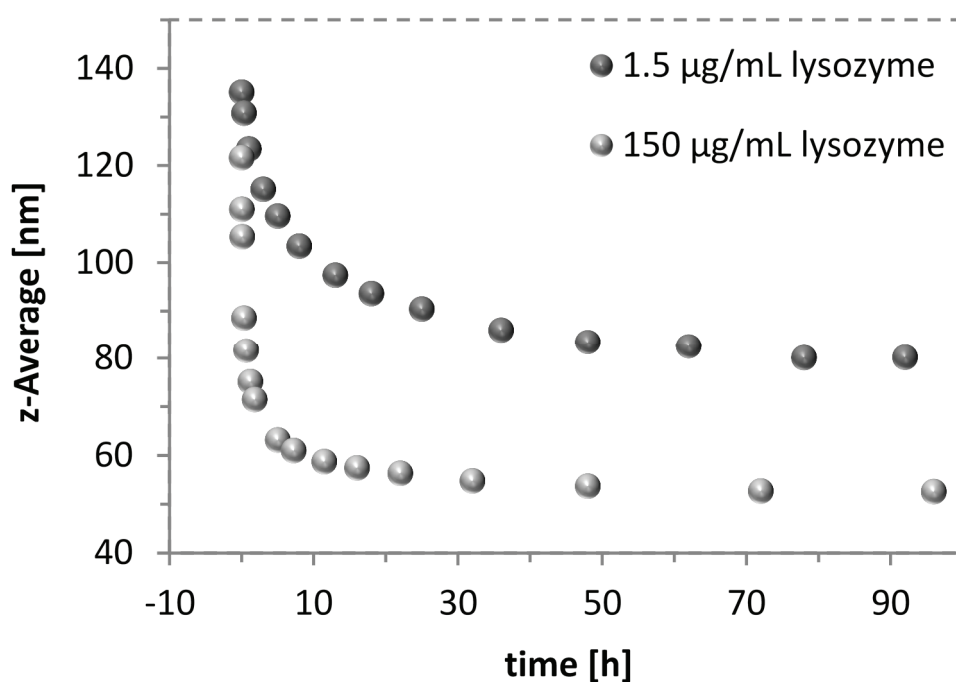

**Figure S2.** Plot of the particle size over the time during the degradation with 1.5 µg/mL or 150 µg/mL lysozyme at 37 °C for chitosan-tripolyphosphate (3:1, 1 mg/mL, 0.075% AcOH, DA 42%) nanoparticle solutions.
